# Supplementary material for: Antimicrobial Activity of Morphology-Controlled Cu2O Nanoparticles: Oxidation Stability under Humid and Thermal Conditions
Source: MDPI journal article supplement (doi:10.3390/ma17010261), 2024-01-04
Supplement: s1 [file s1]

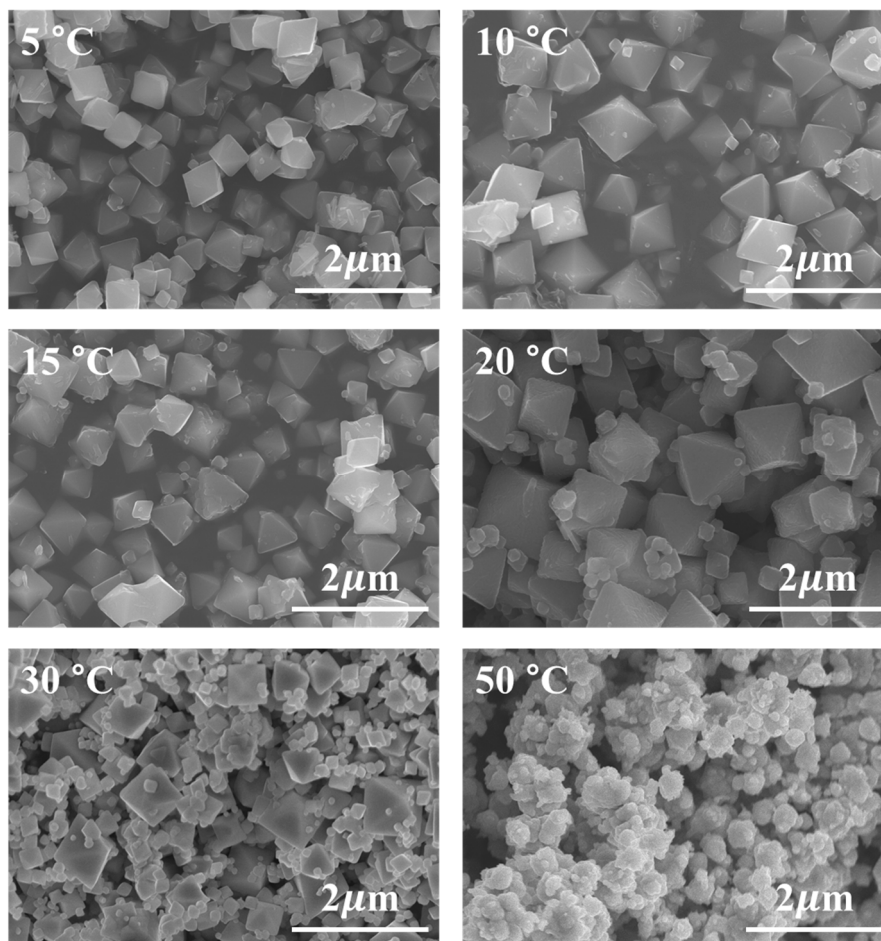

**Figure S1.** SEM images of the octahedral  $\text{Cu}_2\text{O}$  particles prepared at different temperatures.

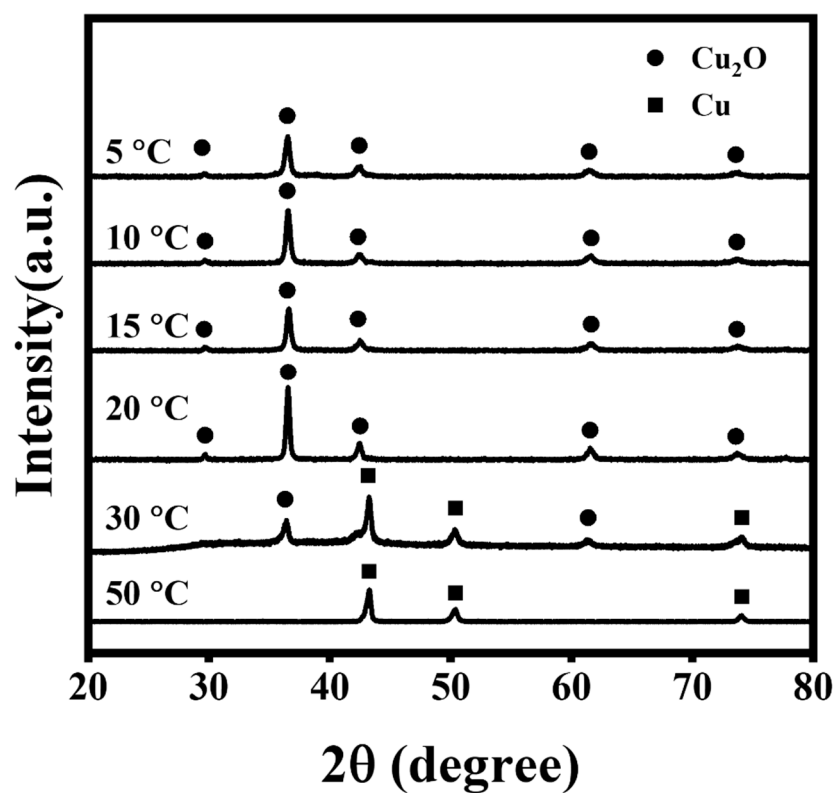

Figure S2. XRD patterns of the octahedral  $\text{Cu}_2\text{O}$  particles prepared at different temperatures.

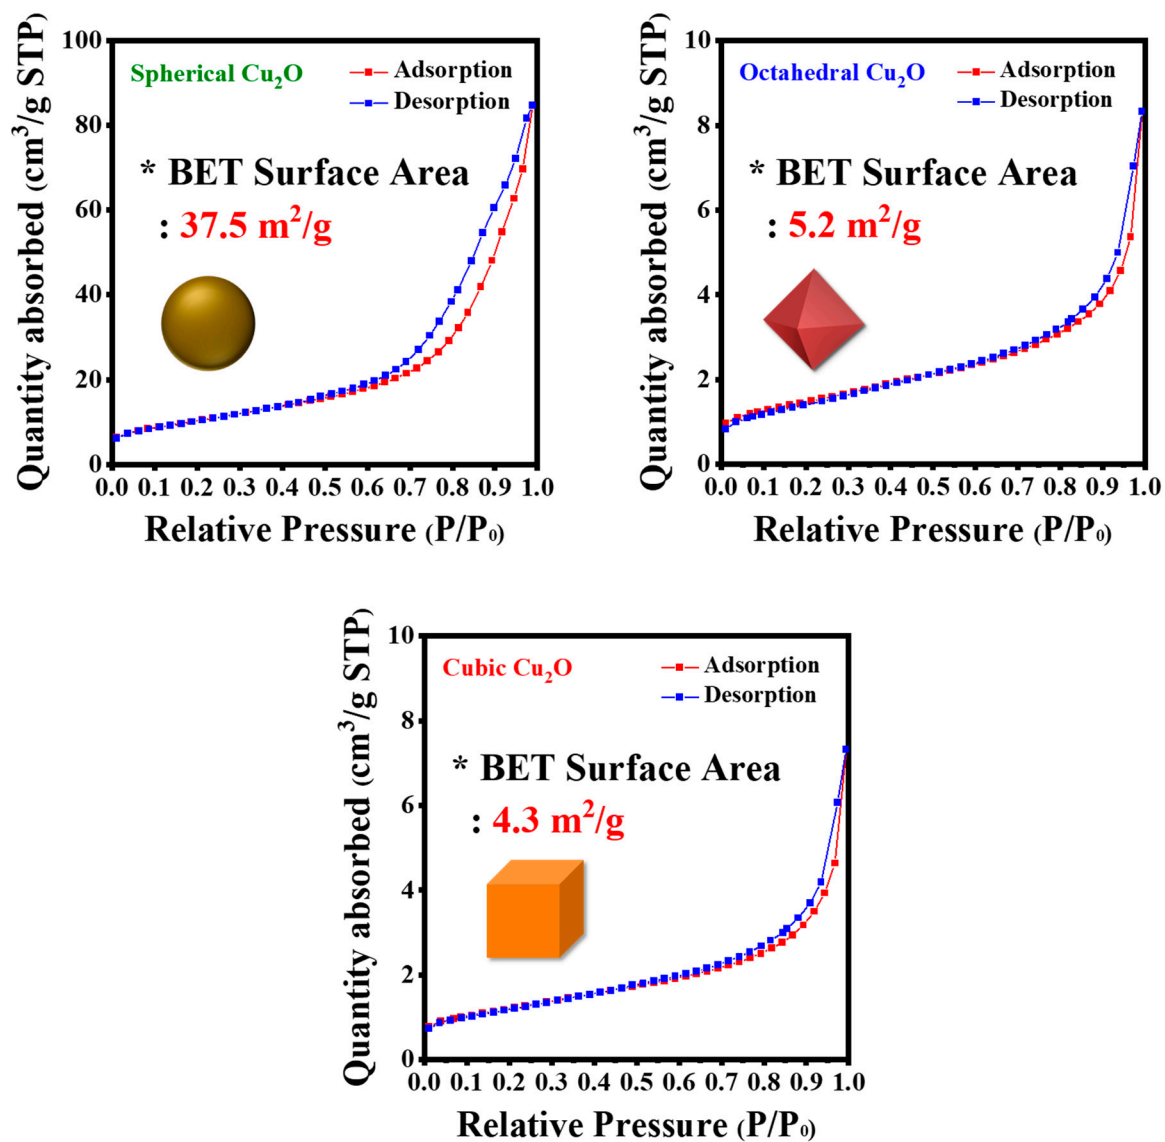

Figure S3. Specific surface area of  $\text{Cu}_2\text{O}$  particles with three distinct morphologies.

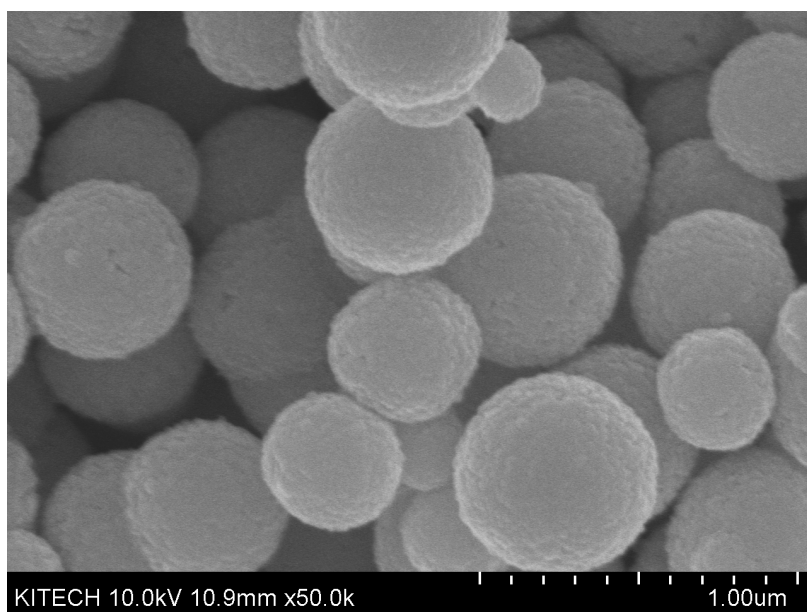

**Figure S4.** SEM images of spherical Cu<sub>2</sub>O particles.

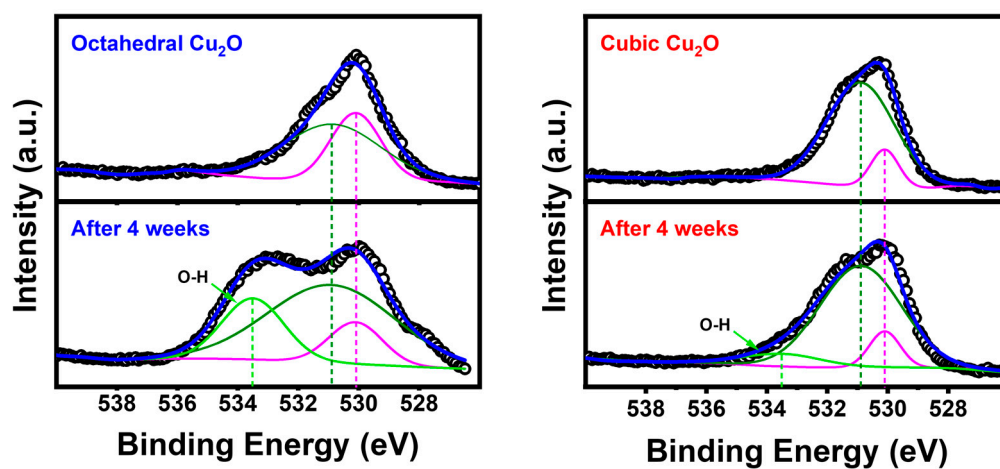

Figure S5. High resolution XPS of the O 1s peak of octahedral and cubic  $\text{Cu}_2\text{O}$  for zero and four weeks.
